# Supplementary material for: Mid-to-late-life social network size and resilience to neurodegeneration: the Framingham Heart Study
Source: Research Square preprint supplement (doi:10.21203/rs.3.rs-8735065/v1), 2026-02-19
Supplement: Supplementary file 1 [file ffacd80e6012812f294d4cbf.docx]

**SUPPLEMENTARY MATERIALS**

**Supplemental Figure 1.**

| **Berkman Syme Social Network Questionnaire** | | | | | |
| --- | --- | --- | --- | --- | --- |
| **The next questions ask about your social support. Please circle the responses that most closely describes your current situation.** | | | | | |
| 1. How many *close friends* do you have, people that you feel at ease with, can talk to about private matters? | | | | | |
| “None” | “1 or 2” | “3 to 5” | “6 to 9” | “10 or more” |  |
| 2. How many of these *close friends* do you see at least once a month? | | | | | |
| “None” | “1 or 2” | “3 to 5” | “6 to 9” | “10 or more” |  |
| 3. How many *relatives* do you have, people, that you feel at ease with, can talk to about private matters? | | | | | |
| “None” | “1 or 2” | “3 to 5” | “6 to 9” | “10 or more” |  |
| 4. How many of these *relatives* do you see at least once a month? | | | | | |
| “None” | “1 or 2” | “3 to 5” | “6 to 9” | “10 or more” |  |
| 5. Do you participate in any groups such as a senior center, social or work group, religious connected group, self-help group, or charity, public service or community group? | | | | | |
| “No” | “Yes” |  |  |  |  |
| 6. About how often do you go to religious meetings or services? | | | | | |
| “Never or almost never” | “Once or twice a year” | “Every few months” | “Once or twice a month” | “Once a week” | “More than once a week” |
| 7. Is there someone available to you whom you can count on to listen to you when you need to talk? | | | | | |
| **“**None of the time” | “A little of the time” | “Some of the time” | “Most of the time” | “All of the time” |  |
| 8. Is there someone available to give you good advice about a problem? | | | | | |
| **“**None of the time” | “A little of the time” | “Some of the time” | “Most of the time” | “All of the time” |  |
| 9. Is there someone available to you who shows you love and affection? | | | | | |
| **“**None of the time” | “A little of the time” | “Some of the time” | “Most of the time” | “All of the time” |  |
| 10. Can you count on anyone to provide you with emotional support (talking over problems or helping you make a difficult decision)? | | | | | |
| **“**None of the time” | “A little of the time” | “Some of the time” | “Most of the time” | “All of the time” |  |
| 11. Do you have as much contact as you would like with someone you feel close to, someone in whom you can trust and confide? | | | | | |
| **“**None of the time” | “A little of the time” | “Some of the time” | “Most of the time” | “All of the time” |  |

**Supplemental Table 1.** Associations between social network size and resilience to neurodegeneration in memory, language, and executive function, stratified by sex

| **Males (n = 722)** | | | | | | |
| --- | --- | --- | --- | --- | --- | --- |
|  | **Memory** | | **Language** | | **Executive Function** | |
|  | **β**  **(95% CI)** | ***P*** | **β**  **(95% CI)** | ***P*** | **β**  **(95% CI)** | ***P*** |
| **Social Network Size** |  |  |  |  |  |  |
| Small | Ref. | Ref. | Ref. | Ref. | Ref. | Ref. |
| Medium | -0.02  (-0.11 - 0.06) | 0.57 | 0.02  (-0.08 - 0.13) | 0.67 | 0.02  (-0.08 - 0.13) | 0.65 |
| Large | -0.02  (-0.11 - 0.07) | 0.62 | -0.03  (-0.13 - 0.08) | 0.61 | -0.02  (-0.12 - 0.09) | 0.76 |
| **Females (n = 880)** | | | | | | |
|  | **Memory** | | **Language** | | **Executive Function** | |
|  | **β**  **(95% CI)** | ***P*** | **β**  **(95% CI)** | ***P*** | **β**  **(95% CI)** | ***P*** |
| **Social Network Size** |  |  |  |  |  |  |
| Small | Ref. | Ref. | Ref. | Ref. | Ref. | Ref. |
| Medium | 0.06  (-0.04 - 0.16) | 0.21 | -0.08  (-0.18 - 0.03) | 0.15 | 0.01  (-0.09 - 0.11) | 0.85 |
| Large | 0.06  (-0.03 - 0.15) | 0.20 | -0.05  (-0.15 - 0.04) | 0.27 | 0.02  (-0.07 - 0.12) | 0.65 |
| *P*interaction |  | 0.83 |  | 0.50 |  | 0.59 |

CI: Confidence interval; *P*: p-value; Ref.: Reference

*Adjusted for age, education, *APOE* genotype, time between exam date where plasma t-tau was measured and NP exam date, physical activity, depressive symptoms, and smoking status

**Supplemental Table 2.** Associations between social network size and resilience to neurodegeneration in memory, language, and executive function, stratified by *APOE* ε4 allele carrier status

| **≥1 ε4 allele (n = 315)** | | | | | | |
| --- | --- | --- | --- | --- | --- | --- |
|  | **Memory** | | **Language** | | **Executive Function** | |
| **Social Network Size** | β  (95% CI) | *P* | β  (95% CI) | *P* | β  (95% CI) | *P* |
|  |  |  |  |  |  |  |
| Small | Ref. | Ref. | Ref. | Ref. | Ref. | Ref. |
| Medium | 0.11  (-0.06 - 0.29) | 0.21 | 0.17  (-0.02 - 0.37) | 0.08 | 0.06  (-0.13 - 0.25) | 0.54 |
| Large | 0.03  (-0.12 - 0.19) | 0.67 | 0.06  (-0.12 - 0.23) | 0.53 | 0.06  (-0.12 - 0.23) | 0.53 |
| **No ε4 allele (n = 1,249)** | | | | | | |
|  | **Memory** | | **Language** | | **Executive Function** | |
|  | β (95% CI) | *P* | β (95% CI) | *P* | β (95% CI) | *P* |
| **Social Network Size** |  |  |  |  |  |  |
| Small | Ref. | Ref. | Ref. | Ref. | Ref. | Ref. |
| Medium | -0.01  (-0.08 - 0.07) | 0.90 | -0.06  (-0.14 - 0.03) | 0.18 | 0.01  (-0.08 - 0.09) | 0.84 |
| Large | 0.08  (0.01 - 0.15) | 0.02 | 0.03  (-0.05 - 0.10) | 0.48 | 0.07  (-0.01 - 0.15) | 0.09 |
| *P*interaction |  | 0.26 |  | 0.23 |  | 0.12 |

CI: Confidence interval; *P*: p-value; Ref.: Reference

*Adjusted for age, education, sex, time between exam date where plasma t-tau was measured and NP exam date, physical activity, depressive symptoms, and smoking status
